# Supplementary material
Source: Springer Nature journal article supplement (https://www.springermedizin.de/resource/supplementary/12889_2007_1159_MOESM1_ESM.pdf/9502580)

# Incidence rate of first CVD (per 100 000 PY)

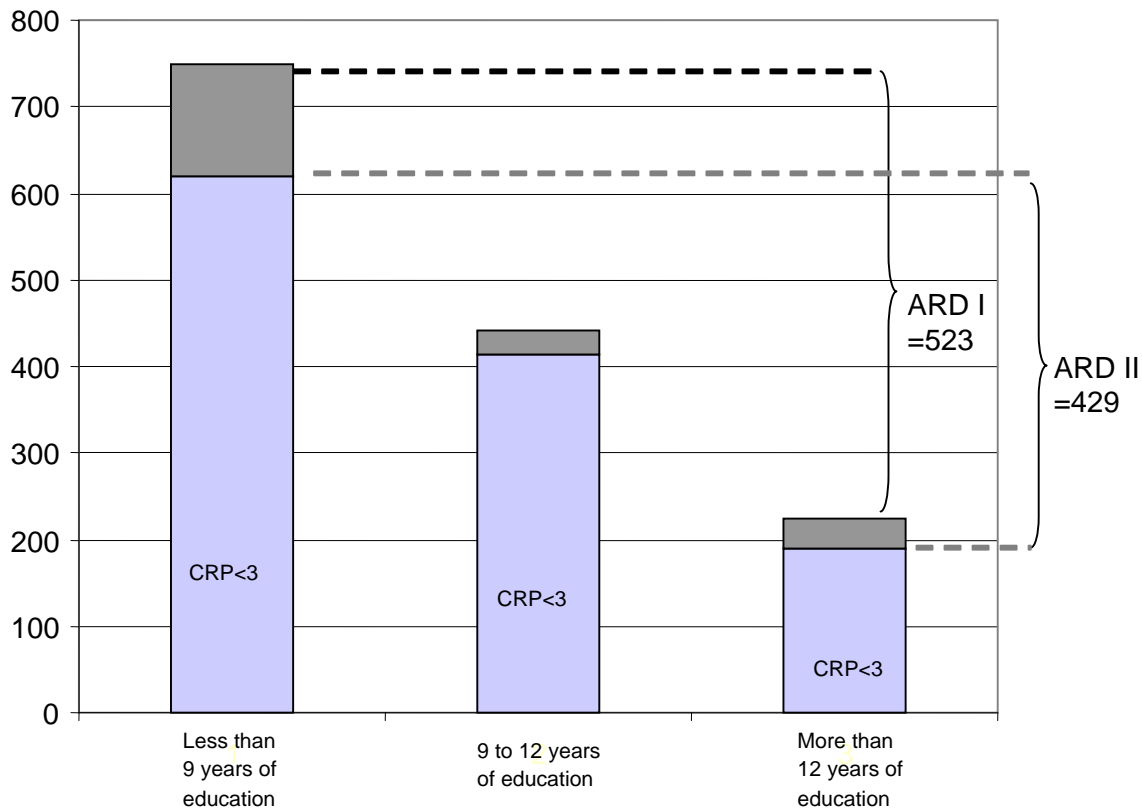

Supplement: MOESM1 [file 9502580]
